# Supplementary material for: Samarium(iii) and terbium(iii) ion-doped NaLa(MoO4)2 phosphors for versatile applications
Source: Royal Society of Chemistry journal article supplement (doi:10.1039/c9nj01751h), 2019-01-01
Supplement: c9nj01751h1.pdf [file c9nj01751h1.pdf]

## Supporting Information

### **Samarium(III) and Terbium(III) ions-doped NaLa(MoO<sub>4</sub>)<sub>2</sub> phosphors for versatile applications**

**Yongbin Hua, Sk. Khaja Hussain and Jae Su Yu\***

*Department of Electronic Engineering, Institute for Wearable Convergence Electronics, Kyung Hee University,*

*Yongin-si, Gyeonggi-do 17104, Republic of Korea*

\*Corresponding author: E-mail: [jsyu@khu.ac.kr](mailto:jsyu@khu.ac.kr)

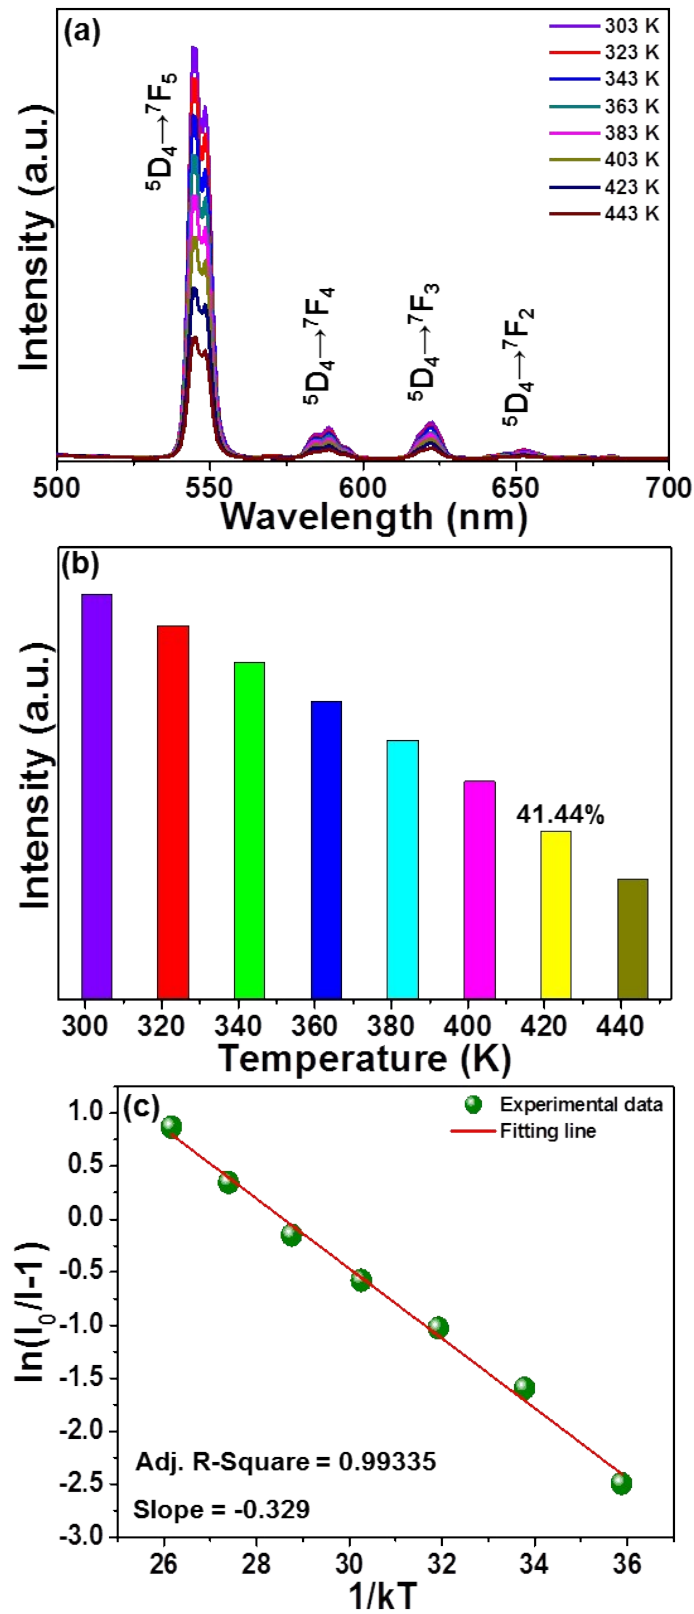

Fig. S1. (a) PL emission spectra as a function of temperature, (b) dependence of PL emission intensity on temperature and (c) plot of  $\ln(I_0/I-1)$  vs.  $1/kT$  of the NaLa(MoO<sub>4</sub>)<sub>2</sub>:0.13Tb<sup>3+</sup> phosphor at 485 nm.
